# Supplementary material for: Theoretical framework for achieving high Voc in non-fused non-fullerene terthiophene-based end-capped modified derivatives for potential applications in organic photovoltaics
Source: Royal Society of Chemistry journal article supplement (doi:10.1039/d3ra00038a), 2023-01-01
Supplement: d3ra00038a1.pdf [file d3ra00038a1.pdf]

## Supporting Information

### Theoretical framework for achieving High Voc in Non-fused non-fullerene terthiophene-based end-capped modified derivatives for potential applications in organic photovoltaics

Muhammad Waqas<sup>a</sup>, N.M.A. Hadia<sup>b</sup>, Ahmed M. Shawky<sup>c\*</sup>, Rana Farhat Mahmood<sup>d</sup>, Manel Essid<sup>e</sup>,  
Zouhaier Aloui<sup>e</sup>, Javed Iqbal<sup>a\*</sup>, Naifa S. Alatawi<sup>f</sup>, Rasheed Ahmad Khera<sup>a\*</sup>

<sup>a</sup>*Department of Chemistry, University of Agriculture, Faisalabad 38000, Pakistan*

<sup>b</sup>*Physics Department, College of Science, Jouf University, P.O. Box 2014, Sakaka, Al-Jouf,  
Saudi Arabia*

<sup>c</sup>*Science and Technology Unit (STU), Umm Al-Qura University, Makkah, 21955, Saudi Arabia*

<sup>e</sup>*Department of Chemistry, Division of Science and Technology, University of Education,  
Township, Lahore 54770, Pakistan*

<sup>e</sup>*Chemistry Department, College of Science, King Khalid University (KKU), Abha, P.O. Box  
9004, Saudi Arabia*

<sup>f</sup>*Physics Department, Faculty of Science, University of Tabuk, Tabuk, 71421, Saudi Arabia*

Email: [javedkhattak79@gmail.com](mailto:javedkhattak79@gmail.com); [Javed.iqbal@uaf.edu.pk](mailto:Javed.iqbal@uaf.edu.pk)(J.I), [rasheedahmadkhera@yahoo.com](mailto:rasheedahmadkhera@yahoo.com);  
[rasheed.ahmad.khera@uaf.edu.pk](mailto:rasheed.ahmad.khera@uaf.edu.pk) (R.A.K)

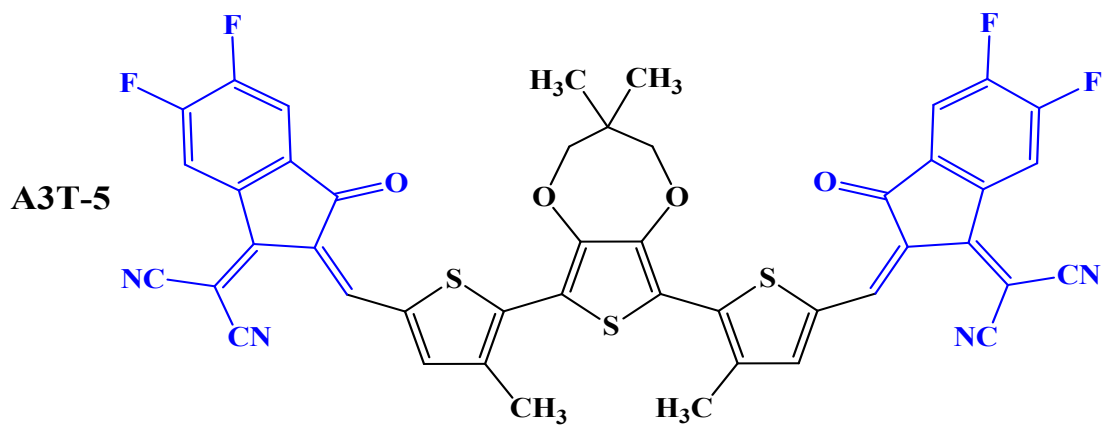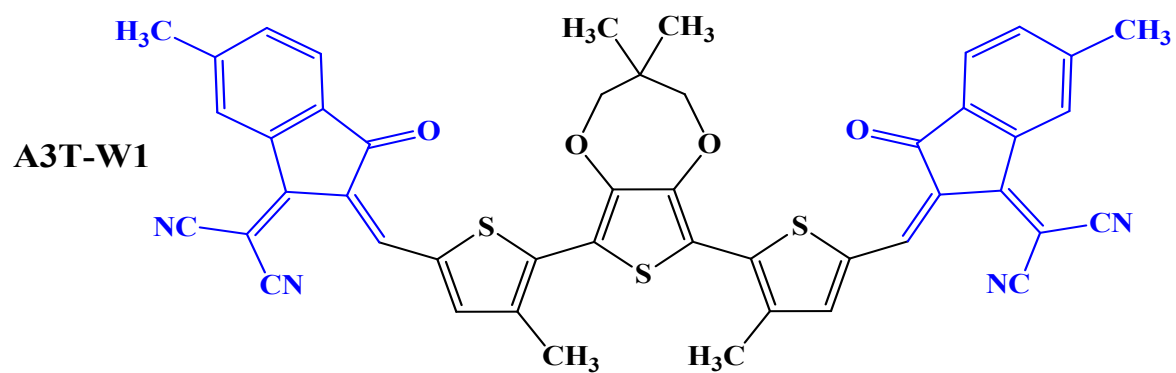

A3T-W2

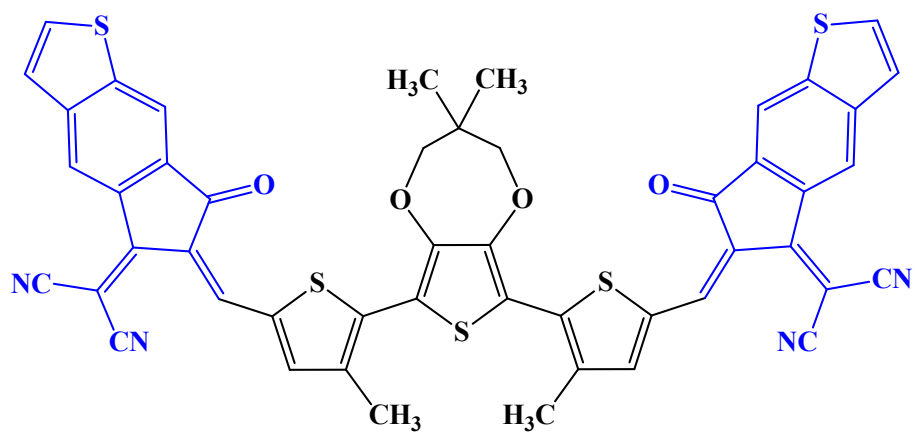

A3T-W3

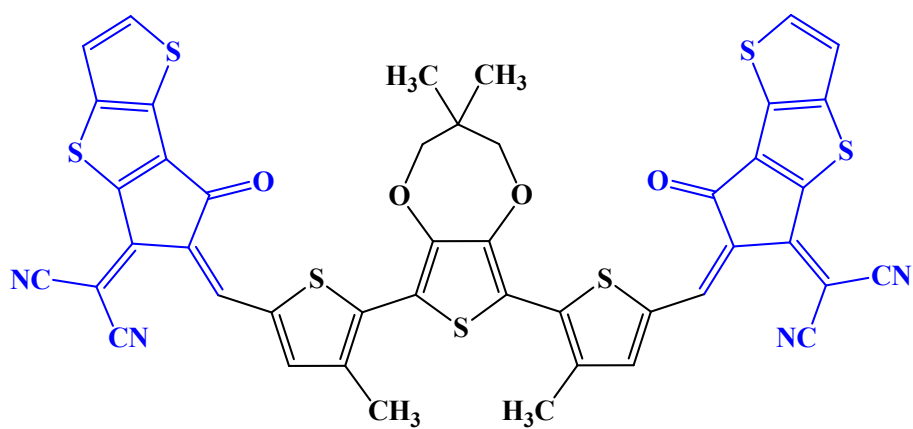

A3T-W4

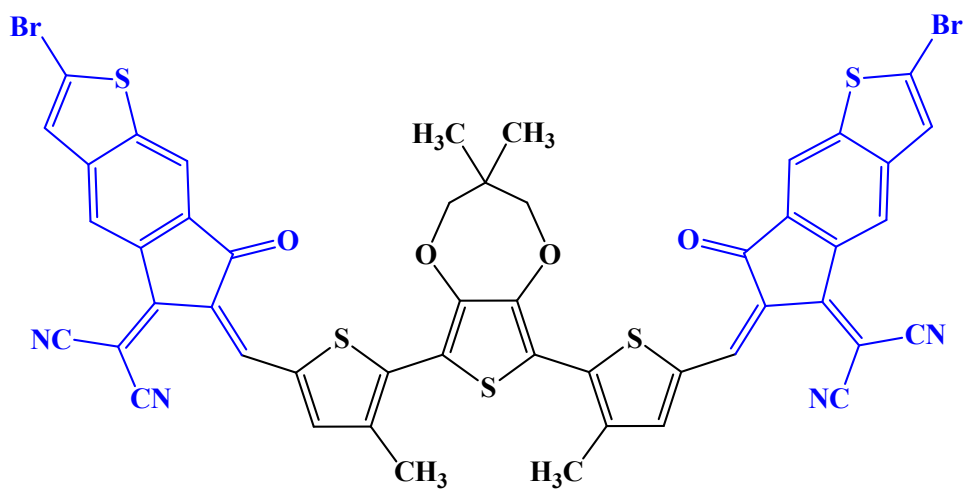

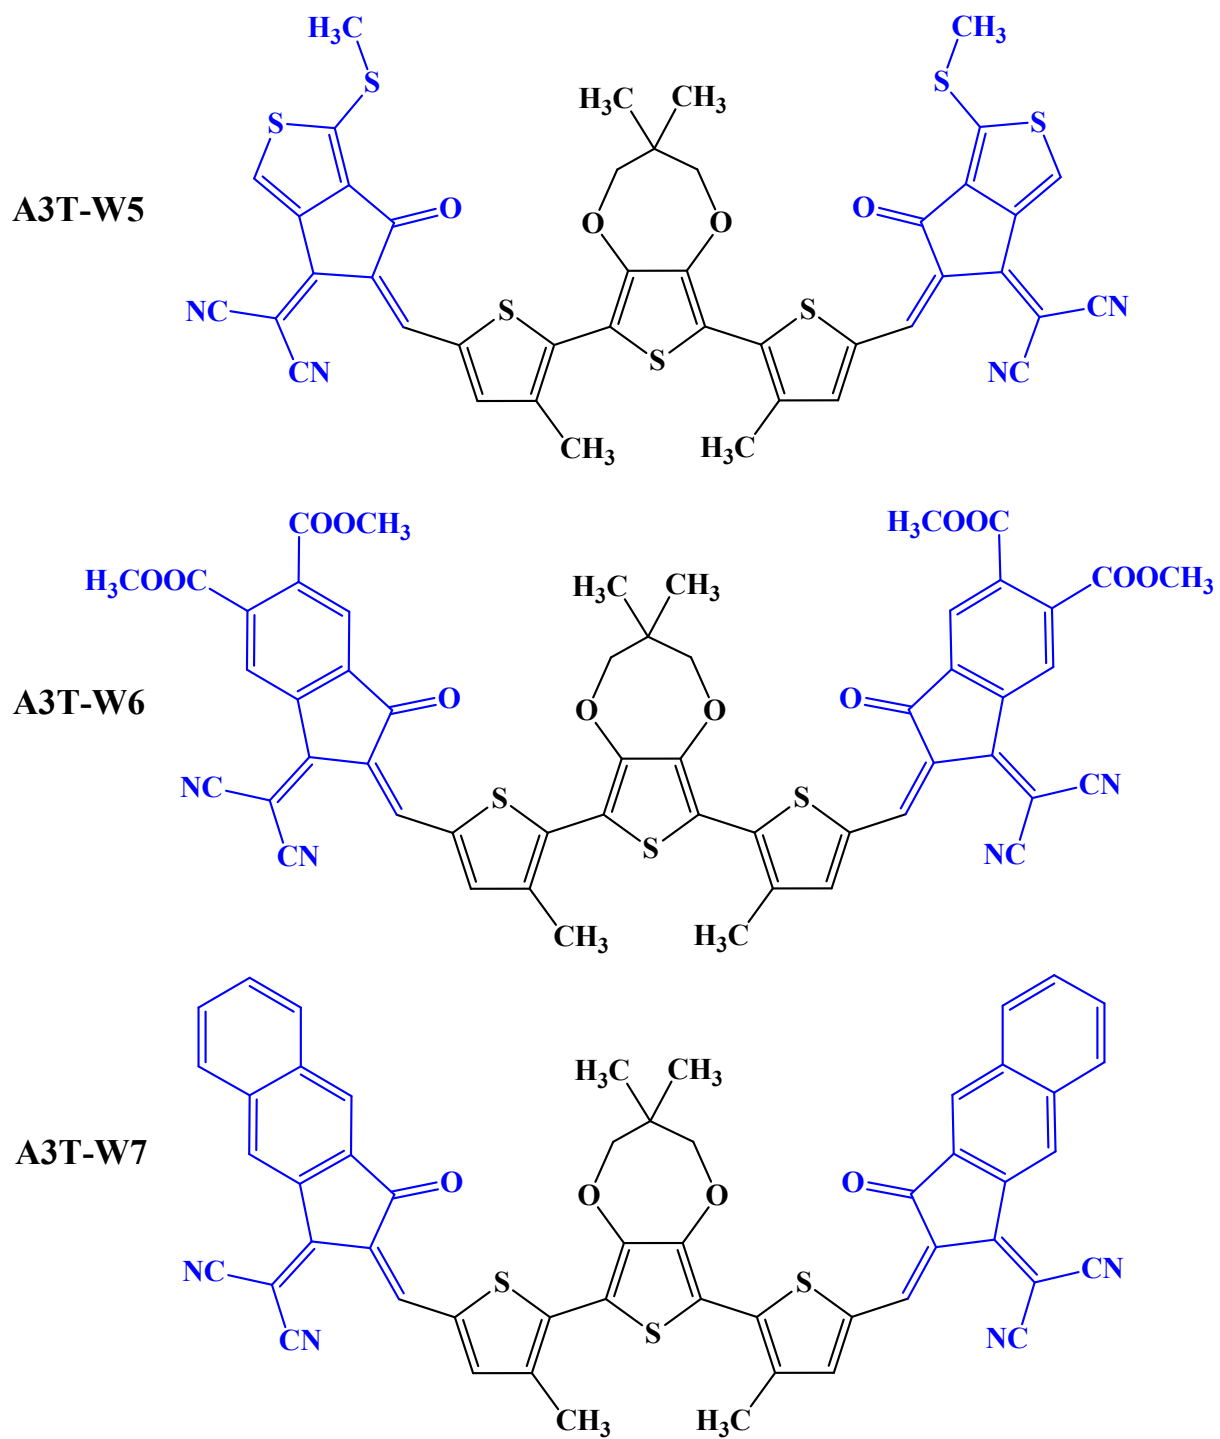

**Figure S1.** Structural configuration of A3T-5 and newly proposed molecules under study.

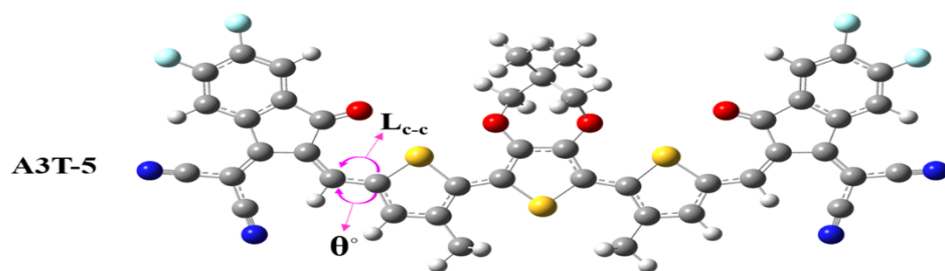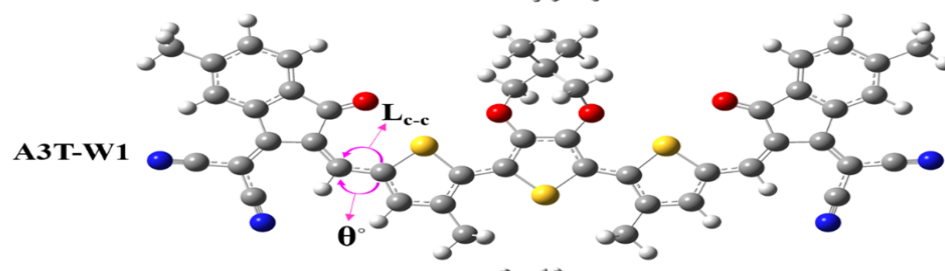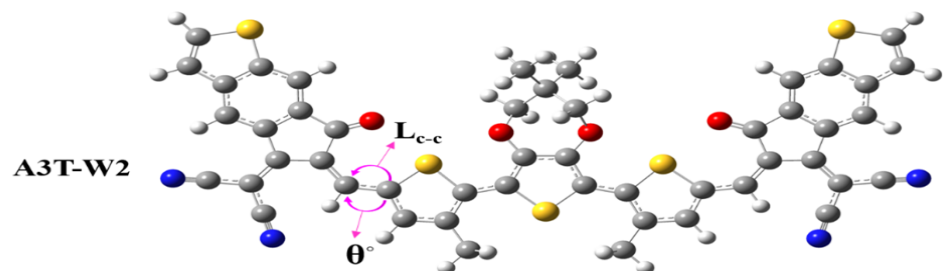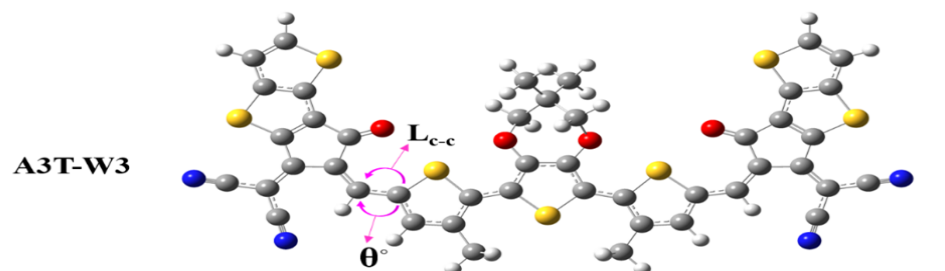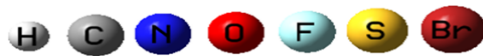

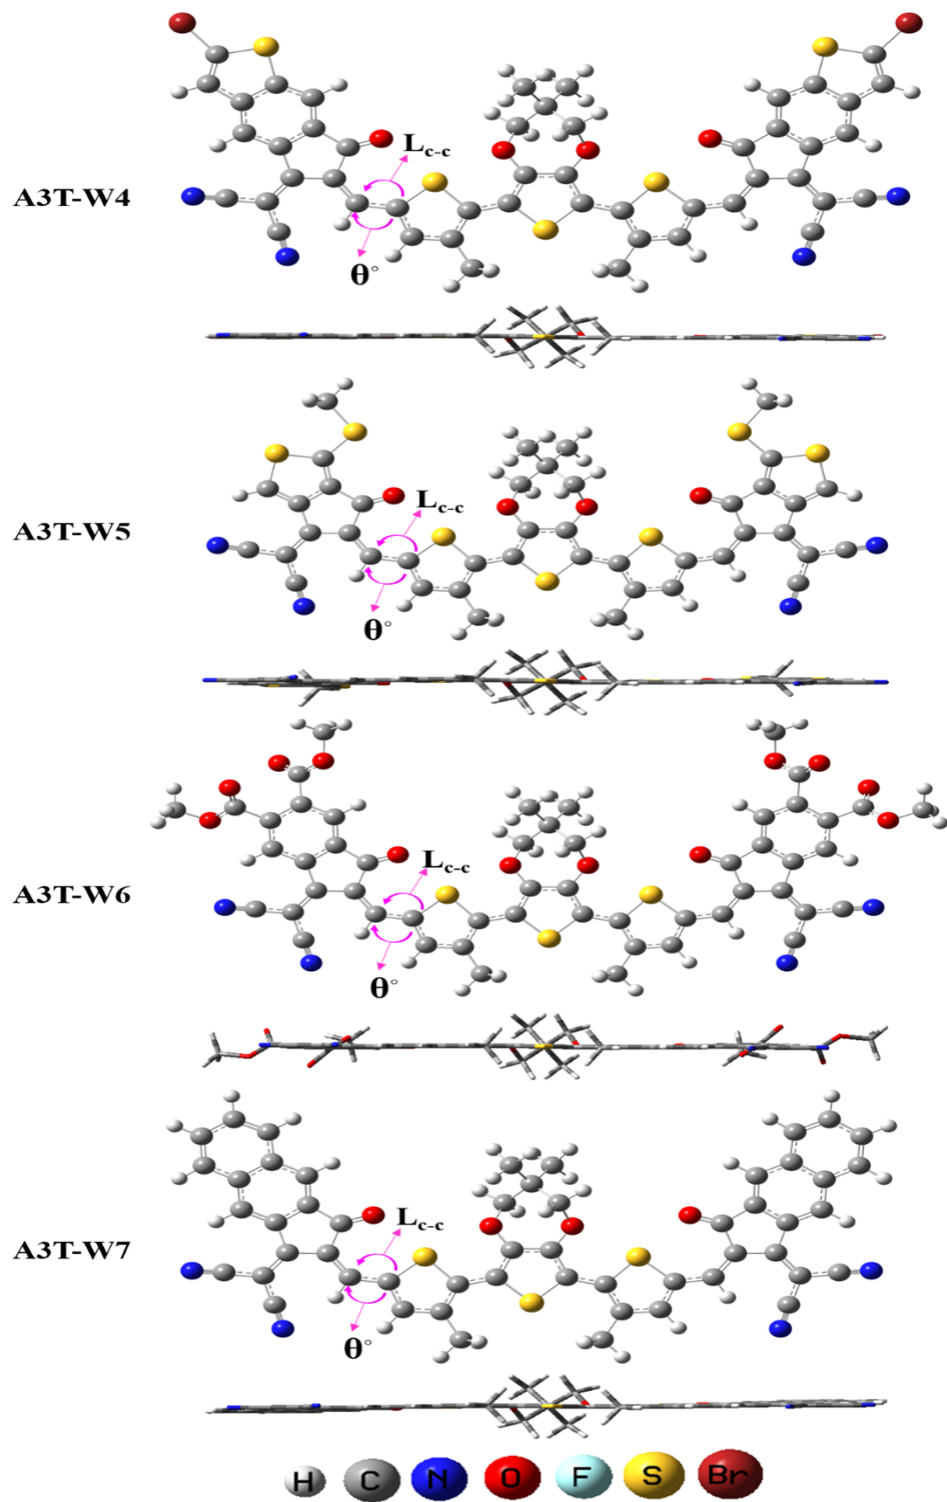

**Figure S2.** The optimal geometries of all examined compounds in front and side view.

**Table S1:** Cartesian coordinates of internally optimized geometries of all molecules (reference **A3T-5** and investigated molecules **A3T-W1** to **A3T-W7**) along X, Y and Z axis at CAM-B3LYP/6-31G (d, p) level of density functional theory (DFT).

**Cartesian coordinates of Reference Molecule (A3T-5)**

| -----  |        |        |                         |           |           |
|--------|--------|--------|-------------------------|-----------|-----------|
| Center | Atomic | Atomic | Coordinates (Angstroms) |           |           |
| Number | Number | Type   | X                       | Y         | Z         |
| -----  |        |        |                         |           |           |
| 1      | 6      | 0      | -1.275345               | -1.610056 | -0.003529 |
| 2      | 6      | 0      | -0.671198               | -0.366345 | -0.008283 |
| 3      | 6      | 0      | 0.728429                | -0.373062 | 0.010917  |
| 4      | 6      | 0      | 1.286641                | -1.637865 | 0.029855  |
| 5      | 16     | 0      | -0.007343               | -2.812336 | 0.035896  |
| 6      | 8      | 0      | 1.377671                | 0.809329  | -0.010934 |
| 7      | 8      | 0      | -1.428677               | 0.796417  | -0.201997 |
| 8      | 6      | 0      | 1.385510                | 2.099454  | 0.077844  |
| 9      | 6      | 0      | -1.197404               | 2.070595  | -0.108479 |
| 10     | 6      | 0      | 0.022668                | 2.668302  | 0.262074  |
| 11     | 6      | 0      | -0.019790               | 3.796660  | 1.286096  |
| 12     | 6      | 0      | -0.112659               | 3.477306  | -1.038274 |
| 13     | 1      | 0      | -0.350350               | 3.398942  | 2.246713  |
| 14     | 1      | 0      | -0.815908               | 4.406325  | 0.854112  |
| 15     | 1      | 0      | 0.856323                | 4.426315  | 1.460004  |
| 16     | 1      | 0      | -0.878648               | 4.082481  | -1.527964 |
| 17     | 1      | 0      | 0.185967                | 2.665810  | -1.701200 |
| 18     | 1      | 0      | 0.760952                | 4.105967  | -0.847166 |
| 19     | 6      | 0      | 5.170024                | -1.861361 | 0.054677  |
| 20     | 6      | 0      | 4.658564                | -3.158465 | 0.107194  |
| 21     | 6      | 0      | 3.267019                | -3.253765 | 0.103995  |

|    |    |   |            |           |           |
|----|----|---|------------|-----------|-----------|
| 22 | 6  | 0 | 2.679841   | -1.980628 | 0.050966  |
| 23 | 16 | 0 | 3.866700   | -0.707511 | 0.004316  |
| 24 | 1  | 0 | 5.311009   | -4.023620 | 0.147386  |
| 25 | 6  | 0 | -2.671695  | -1.950669 | -0.029457 |
| 26 | 6  | 0 | -3.252669  | -3.228261 | -0.062698 |
| 27 | 6  | 0 | -4.645542  | -3.141201 | -0.070000 |
| 28 | 6  | 0 | -5.165172  | -1.848142 | -0.039811 |
| 29 | 16 | 0 | -3.870771  | -0.686569 | -0.008173 |
| 30 | 1  | 0 | -5.291574  | -4.011575 | -0.096596 |
| 31 | 6  | 0 | 2.546651   | -4.566104 | 0.154887  |
| 32 | 6  | 0 | -2.536309  | -4.543406 | -0.086230 |
| 33 | 1  | 0 | 1.902356   | -4.644836 | 1.035675  |
| 34 | 1  | 0 | 3.264845   | -5.386168 | 0.199363  |
| 35 | 1  | 0 | 1.922536   | -4.724963 | -0.729908 |
| 36 | 1  | 0 | -3.258143  | -5.360016 | -0.134095 |
| 37 | 1  | 0 | -1.929002  | -4.694646 | 0.811340  |
| 38 | 1  | 0 | -1.876143  | -4.634958 | -0.953749 |
| 39 | 6  | 0 | -6.572888  | -1.651587 | -0.045662 |
| 40 | 6  | 0 | 6.573942   | -1.655140 | 0.051471  |
| 41 | 6  | 0 | -7.372667  | -0.539017 | -0.022439 |
| 42 | 6  | 0 | -8.835774  | -0.509987 | -0.035468 |
| 43 | 6  | 0 | -9.244394  | 0.910934  | 0.004326  |
| 44 | 6  | 0 | -8.096751  | 1.713604  | 0.039056  |
| 45 | 6  | 0 | -6.895488  | 0.858507  | 0.024628  |
| 46 | 6  | 0 | -9.709007  | -1.573888 | -0.077607 |
| 47 | 6  | 0 | -11.125755 | -1.419140 | -0.086275 |
| 48 | 6  | 0 | -9.300813  | -2.938709 | -0.117626 |
| 49 | 7  | 0 | -8.999274  | -4.061100 | -0.151153 |



|    |   |   |            |           |           |
|----|---|---|------------|-----------|-----------|
| 50 | 7 | 0 | -12.284470 | -1.329202 | -0.094513 |
| 51 | 8 | 0 | -5.741011  | 1.247476  | 0.049427  |
| 52 | 1 | 0 | -7.085470  | -2.606432 | -0.073961 |
| 53 | 6 | 0 | -10.503199 | 1.516481  | 0.011651  |
| 54 | 6 | 0 | -10.552169 | 2.899434  | 0.053659  |
| 55 | 6 | 0 | -9.393952  | 3.686051  | 0.087876  |
| 56 | 6 | 0 | -8.143297  | 3.097722  | 0.081056  |
| 57 | 1 | 0 | -11.436165 | 0.971039  | -0.013236 |
| 58 | 1 | 0 | -7.239845  | 3.694806  | 0.107210  |
| 59 | 6 | 0 | 7.368871   | -0.537496 | 0.010147  |
| 60 | 6 | 0 | 8.830730   | -0.504556 | 0.017276  |
| 61 | 6 | 0 | 9.236178   | 0.917631  | -0.030127 |
| 62 | 6 | 0 | 8.086149   | 1.716245  | -0.068564 |
| 63 | 6 | 0 | 6.887087   | 0.856912  | -0.047853 |
| 64 | 6 | 0 | 9.708862   | -1.565253 | 0.057298  |
| 65 | 6 | 0 | 11.124888  | -1.404885 | 0.059025  |
| 66 | 6 | 0 | 9.307565   | -2.931971 | 0.099521  |
| 67 | 7 | 0 | 9.013103   | -4.056280 | 0.134193  |
| 68 | 7 | 0 | 12.283387  | -1.310820 | 0.061501  |
| 69 | 8 | 0 | 5.731707   | 1.244842  | -0.075671 |
| 70 | 6 | 0 | 10.492962  | 1.526928  | -0.041643 |
| 71 | 6 | 0 | 10.538009  | 2.909932  | -0.091552 |
| 72 | 6 | 0 | 9.377691   | 3.692525  | -0.129707 |
| 73 | 6 | 0 | 8.128904   | 3.100055  | -0.118689 |
| 74 | 1 | 0 | 11.427552  | 0.984413  | -0.013891 |
| 75 | 1 | 0 | 7.223886   | 3.694517  | -0.147456 |
| 76 | 1 | 0 | 7.093566   | -2.605752 | 0.091787  |
| 77 | 9 | 0 | -9.529519  | 5.006849  | 0.126992  |

|    |   |   |            |          |           |
|----|---|---|------------|----------|-----------|
| 78 | 9 | 0 | -11.726878 | 3.520403 | 0.062276  |
| 79 | 9 | 0 | 9.508469   | 5.014026 | -0.176652 |
| 80 | 9 | 0 | 11.711256  | 3.534257 | -0.104173 |
| 81 | 1 | 0 | -1.441277  | 2.480178 | -1.066428 |
| 82 | 1 | 0 | -1.925062  | 2.447169 | 0.579712  |
| 83 | 1 | 0 | 1.994217   | 2.384646 | 0.910335  |
| 84 | 1 | 0 | 1.810846   | 2.504590 | -0.816502 |

-----

**Cartesian coordinates of Designed Molecule A3T-W1**

-----

| <b>Center</b> | <b>Atomic</b> | <b>Atomic</b> | <b>Coordinates (Angstroms)</b> |           |           |
|---------------|---------------|---------------|--------------------------------|-----------|-----------|
| <b>Number</b> | <b>Number</b> | <b>Type</b>   | <b>X</b>                       | <b>Y</b>  | <b>Z</b>  |
| 1             | 6             | 0             | -1.265856                      | -1.444856 | 0.096566  |
| 2             | 6             | 0             | -0.705728                      | -0.176768 | 0.046338  |
| 3             | 6             | 0             | 0.709029                       | -0.177382 | -0.040796 |
| 4             | 6             | 0             | 1.268100                       | -1.445973 | -0.090320 |
| 5             | 16            | 0             | 0.000643                       | -2.642475 | 0.003670  |
| 6             | 8             | 0             | 1.474529                       | 0.936018  | -0.064526 |
| 7             | 8             | 0             | -1.470332                      | 0.937274  | 0.069038  |
| 8             | 6             | 0             | 0.994222                       | 2.015320  | 0.749005  |
| 9             | 6             | 0             | -0.989121                      | 2.015379  | -0.745557 |
| 10            | 6             | 0             | 0.002908                       | 2.911111  | 0.001288  |
| 11            | 6             | 0             | -0.714275                      | 3.782399  | 1.035304  |
| 12            | 6             | 0             | 0.720739                       | 3.780837  | -1.033593 |
| 13            | 1             | 0             | -1.252737                      | 3.168491  | 1.762023  |

|    |    |   |           |           |           |
|----|----|---|-----------|-----------|-----------|
| 14 | 1  | 0 | -1.437895 | 4.440603  | 0.547178  |
| 15 | 1  | 0 | -0.003532 | 4.413111  | 1.577391  |
| 16 | 1  | 0 | 0.010455  | 4.411556  | -1.576268 |
| 17 | 1  | 0 | 1.258700  | 3.165820  | -1.759743 |
| 18 | 1  | 0 | 1.444879  | 4.438958  | -0.546134 |
| 19 | 6  | 0 | 5.160449  | -1.646258 | -0.087794 |
| 20 | 6  | 0 | 4.653255  | -2.945234 | -0.129151 |
| 21 | 6  | 0 | 3.262613  | -3.045414 | -0.173649 |
| 22 | 6  | 0 | 2.664297  | -1.775851 | -0.140129 |
| 23 | 16 | 0 | 3.852289  | -0.496878 | -0.117806 |
| 24 | 1  | 0 | 5.307649  | -3.810073 | -0.135205 |
| 25 | 6  | 0 | -2.662369 | -1.773463 | 0.145740  |
| 26 | 6  | 0 | -3.261971 | -3.042395 | 0.179580  |
| 27 | 6  | 0 | -4.652441 | -2.940811 | 0.133441  |
| 28 | 6  | 0 | -5.158500 | -1.641391 | 0.090618  |
| 29 | 16 | 0 | -3.849099 | -0.493361 | 0.121405  |
| 30 | 1  | 0 | -5.307642 | -3.805042 | 0.139184  |
| 31 | 6  | 0 | 2.567910  | -4.372192 | -0.254437 |
| 32 | 6  | 0 | -2.568753 | -4.369867 | 0.261806  |
| 33 | 1  | 0 | 2.234132  | -4.717761 | 0.729380  |
| 34 | 1  | 0 | 3.251748  | -5.122757 | -0.654905 |
| 35 | 1  | 0 | 1.696226  | -4.345109 | -0.911052 |
| 36 | 1  | 0 | -3.253775 | -5.119465 | 0.662063  |
| 37 | 1  | 0 | -1.697671 | -4.343329 | 0.919238  |
| 38 | 1  | 0 | -2.234414 | -4.716368 | -0.721492 |
| 39 | 6  | 0 | -6.560866 | -1.429832 | 0.054116  |
| 40 | 6  | 0 | 6.562810  | -1.434931 | -0.053487 |
| 41 | 6  | 0 | -7.359946 | -0.312956 | 0.017030  |

|    |   |   |            |           |           |
|----|---|---|------------|-----------|-----------|
| 42 | 6 | 0 | -8.823898  | -0.292447 | 0.013514  |
| 43 | 6 | 0 | -9.239543  | 1.131475  | -0.061712 |
| 44 | 6 | 0 | -8.092603  | 1.934751  | -0.095220 |
| 45 | 6 | 0 | -6.890366  | 1.086945  | -0.039867 |
| 46 | 6 | 0 | -9.689285  | -1.367038 | 0.073491  |
| 47 | 6 | 0 | -11.109411 | -1.243282 | 0.058571  |
| 48 | 6 | 0 | -9.274453  | -2.727865 | 0.162273  |
| 49 | 7 | 0 | -8.993797  | -3.854125 | 0.237317  |
| 50 | 7 | 0 | -12.271161 | -1.198816 | 0.048574  |
| 51 | 8 | 0 | -5.737777  | 1.484343  | -0.017152 |
| 52 | 1 | 0 | -7.081077  | -2.380391 | 0.059459  |
| 53 | 6 | 0 | -10.494636 | 1.740052  | -0.099620 |
| 54 | 6 | 0 | -10.585519 | 3.134870  | -0.162688 |
| 55 | 6 | 0 | -9.416523  | 3.909317  | -0.193363 |
| 56 | 6 | 0 | -8.160888  | 3.316104  | -0.165057 |
| 57 | 1 | 0 | -11.406941 | 1.160942  | -0.084477 |
| 58 | 1 | 0 | -7.248993  | 3.901492  | -0.200394 |
| 59 | 6 | 0 | 7.360114   | -0.316846 | -0.018028 |
| 60 | 6 | 0 | 8.824083   | -0.292453 | -0.018267 |
| 61 | 6 | 0 | 9.235850   | 1.132590  | 0.057185  |
| 62 | 6 | 0 | 8.086894   | 1.932766  | 0.092536  |
| 63 | 6 | 0 | 6.886858   | 1.081736  | 0.039006  |
| 64 | 6 | 0 | 9.692583   | -1.364423 | -0.081495 |
| 65 | 6 | 0 | 11.112323  | -1.236023 | -0.071446 |
| 66 | 6 | 0 | 9.281659   | -2.726440 | -0.169876 |
| 67 | 7 | 0 | 9.004025   | -3.853464 | -0.244667 |
| 68 | 7 | 0 | 12.273970  | -1.188175 | -0.066024 |
| 69 | 8 | 0 | 5.732945   | 1.475618  | 0.020967  |

|    |   |   |            |           |           |
|----|---|---|------------|-----------|-----------|
| 70 | 6 | 0 | 10.489540  | 1.744816  | 0.087051  |
| 71 | 6 | 0 | 10.576748  | 3.139752  | 0.148947  |
| 72 | 6 | 0 | 9.405628   | 3.911375  | 0.177322  |
| 73 | 6 | 0 | 8.151649   | 3.314672  | 0.157047  |
| 74 | 1 | 0 | 11.403348  | 1.168349  | 0.065779  |
| 75 | 1 | 0 | 7.238257   | 3.897971  | 0.187968  |
| 76 | 1 | 0 | 7.083635   | -2.385122 | -0.059405 |
| 77 | 1 | 0 | -0.521488  | 1.589209  | -1.638608 |
| 78 | 1 | 0 | -1.871168  | 2.580213  | -1.053756 |
| 79 | 1 | 0 | 0.526254   | 1.590437  | 1.642494  |
| 80 | 1 | 0 | 1.876744   | 2.579737  | 1.056607  |
| 81 | 6 | 0 | -11.933550 | 3.800624  | -0.184427 |
| 82 | 6 | 0 | 11.921980  | 3.808681  | 0.208385  |
| 83 | 1 | 0 | 9.489366   | 4.993186  | 0.212147  |
| 84 | 1 | 0 | -9.502999  | 4.990541  | -0.237696 |
| 85 | 1 | 0 | -11.896812 | 4.756920  | -0.709874 |
| 86 | 1 | 0 | -12.680507 | 3.169904  | -0.670034 |
| 87 | 1 | 0 | -12.283788 | 3.997028  | 0.834233  |
| 88 | 1 | 0 | 12.687913  | 3.207719  | -0.284988 |
| 89 | 1 | 0 | 11.898392  | 4.792302  | -0.265202 |
| 90 | 1 | 0 | 12.235782  | 3.951295  | 1.247684  |

-----

**Cartesian coordinates of Designed Molecule A3T-W2**

-----

| <b>Center</b> | <b>Atomic</b> | <b>Atomic</b> | <b>Coordinates (Angstroms)</b> |           |          |
|---------------|---------------|---------------|--------------------------------|-----------|----------|
| <b>Number</b> | <b>Number</b> | <b>Type</b>   | <b>X</b>                       | <b>Y</b>  | <b>Z</b> |
| 1             | 6             | 0             | -1.269605                      | -1.937591 | 0.030451 |

-----

|    |    |   |           |           |           |
|----|----|---|-----------|-----------|-----------|
| 2  | 6  | 0 | -0.707637 | -0.668216 | 0.011455  |
| 3  | 6  | 0 | 0.707808  | -0.668224 | -0.010571 |
| 4  | 6  | 0 | 1.269753  | -1.937600 | -0.030345 |
| 5  | 16 | 0 | 0.000063  | -3.135428 | -0.000313 |
| 6  | 8  | 0 | 1.469376  | 0.446644  | -0.017498 |
| 7  | 8  | 0 | -1.469191 | 0.446657  | 0.019023  |
| 8  | 6  | 0 | 0.974683  | 1.535055  | 0.775597  |
| 9  | 6  | 0 | -0.974436 | 1.535576  | -0.773339 |
| 10 | 6  | 0 | 0.000121  | 2.428039  | 0.001432  |
| 11 | 6  | 0 | -0.751528 | 3.294772  | 1.014213  |
| 12 | 6  | 0 | 0.751771  | 3.295445  | -1.010772 |
| 13 | 1  | 0 | -1.396975 | 2.684309  | 1.651244  |
| 14 | 1  | 0 | -1.378160 | 4.029870  | 0.502107  |
| 15 | 1  | 0 | -0.055883 | 3.843230  | 1.656480  |
| 16 | 1  | 0 | 0.056133  | 3.844349  | -1.652664 |
| 17 | 1  | 0 | 1.397205  | 2.685400  | -1.648218 |
| 18 | 1  | 0 | 1.378422  | 4.030185  | -0.498173 |
| 19 | 6  | 0 | 5.162156  | -2.147005 | -0.015090 |
| 20 | 6  | 0 | 4.650261  | -3.445891 | -0.019099 |
| 21 | 6  | 0 | 3.260294  | -3.542411 | -0.029432 |
| 22 | 6  | 0 | 2.665863  | -2.268235 | -0.030482 |
| 23 | 16 | 0 | 3.856121  | -0.993495 | -0.025079 |
| 24 | 1  | 0 | 5.303046  | -4.311928 | -0.016472 |
| 25 | 6  | 0 | -2.665724 | -2.268193 | 0.030354  |
| 26 | 6  | 0 | -3.260208 | -3.542347 | 0.028639  |
| 27 | 6  | 0 | -4.650167 | -3.445764 | 0.018261  |
| 28 | 6  | 0 | -5.162014 | -2.146852 | 0.014877  |
| 29 | 16 | 0 | -3.855933 | -0.993408 | 0.025499  |

|    |   |   |            |           |           |
|----|---|---|------------|-----------|-----------|
| 30 | 1 | 0 | -5.302986  | -4.311774 | 0.015166  |
| 31 | 6 | 0 | 2.549397   | -4.861316 | -0.041822 |
| 32 | 6 | 0 | -2.549376  | -4.861294 | 0.040415  |
| 33 | 1 | 0 | 1.928681   | -5.000876 | 0.848354  |
| 34 | 1 | 0 | 3.275232   | -5.675704 | -0.067636 |
| 35 | 1 | 0 | 1.902409   | -4.970057 | -0.917187 |
| 36 | 1 | 0 | -3.275252  | -5.675656 | 0.065891  |
| 37 | 1 | 0 | -1.902358  | -4.970458 | 0.915705  |
| 38 | 1 | 0 | -1.928705  | -5.000491 | -0.849849 |
| 39 | 6 | 0 | -6.563260  | -1.939353 | 0.011852  |
| 40 | 6 | 0 | 6.563403   | -1.939517 | -0.012068 |
| 41 | 6 | 0 | -7.361122  | -0.819994 | 0.004616  |
| 42 | 6 | 0 | -8.822106  | -0.792960 | 0.008229  |
| 43 | 6 | 0 | -9.237616  | 0.626862  | -0.003156 |
| 44 | 6 | 0 | -8.078195  | 1.435104  | -0.015845 |
| 45 | 6 | 0 | -6.881416  | 0.575914  | -0.012792 |
| 46 | 6 | 0 | -9.693708  | -1.863265 | 0.021574  |
| 47 | 6 | 0 | -11.110832 | -1.717026 | 0.024147  |
| 48 | 6 | 0 | -9.286330  | -3.228212 | 0.034427  |
| 49 | 7 | 0 | -8.992048  | -4.353463 | 0.044913  |
| 50 | 7 | 0 | -12.271017 | -1.640309 | 0.026502  |
| 51 | 8 | 0 | -5.723409  | 0.963858  | -0.025552 |
| 52 | 1 | 0 | -7.083482  | -2.890474 | 0.017314  |
| 53 | 6 | 0 | -10.490918 | 1.221178  | -0.002474 |
| 54 | 6 | 0 | -10.562268 | 2.624061  | -0.014511 |
| 55 | 6 | 0 | -9.375860  | 3.403827  | -0.027233 |
| 56 | 6 | 0 | -8.112872  | 2.812578  | -0.027996 |
| 57 | 1 | 0 | -11.407087 | 0.647301  | 0.007331  |

|    |   |   |            |           |           |
|----|---|---|------------|-----------|-----------|
| 58 | 1 | 0 | -7.191851  | 3.384042  | -0.037064 |
| 59 | 6 | 0 | 7.361192   | -0.820110 | -0.004372 |
| 60 | 6 | 0 | 8.822172   | -0.792931 | -0.008084 |
| 61 | 6 | 0 | 9.237535   | 0.626934  | 0.003135  |
| 62 | 6 | 0 | 8.078034   | 1.435050  | 0.016232  |
| 63 | 6 | 0 | 6.881349   | 0.575735  | 0.013745  |
| 64 | 6 | 0 | 9.693881   | -1.863149 | -0.021492 |
| 65 | 6 | 0 | 11.110989  | -1.716764 | -0.024212 |
| 66 | 6 | 0 | 9.286633   | -3.228133 | -0.034258 |
| 67 | 7 | 0 | 8.992464   | -4.353414 | -0.044635 |
| 68 | 7 | 0 | 12.271167  | -1.639949 | -0.026667 |
| 69 | 8 | 0 | 5.723292   | 0.963565  | 0.025596  |
| 70 | 6 | 0 | 10.490774  | 1.221383  | 0.001936  |
| 71 | 6 | 0 | 10.561980  | 2.624272  | 0.013982  |
| 72 | 6 | 0 | 9.375492   | 3.403912  | 0.027030  |
| 73 | 6 | 0 | 8.112568   | 2.812530  | 0.028223  |
| 74 | 1 | 0 | 11.406999  | 0.647602  | -0.008197 |
| 75 | 1 | 0 | 7.191490   | 3.383897  | 0.037502  |
| 76 | 1 | 0 | 7.083649   | -2.890622 | -0.018010 |
| 77 | 1 | 0 | -0.499986  | 1.131972  | -1.673307 |
| 78 | 1 | 0 | -1.858935  | 2.101202  | -1.072878 |
| 79 | 1 | 0 | 0.500254   | 1.130874  | 1.675318  |
| 80 | 1 | 0 | 1.859206   | 2.100464  | 1.075476  |
| 81 | 6 | 0 | -11.736622 | 3.446926  | -0.015154 |
| 82 | 6 | 0 | 11.736246  | 3.447262  | 0.014272  |
| 83 | 6 | 0 | -11.446365 | 4.771011  | -0.029958 |
| 84 | 6 | 0 | 11.445847  | 4.771336  | 0.027037  |
| 85 | 1 | 0 | 12.744138  | 3.053245  | -0.000455 |



|    |    |   |            |          |           |
|----|----|---|------------|----------|-----------|
| 86 | 1  | 0 | -12.744534 | 3.052710 | -0.010697 |
| 87 | 16 | 0 | -9.742058  | 5.102390 | -0.040808 |
| 88 | 16 | 0 | 9.741517   | 5.102518 | 0.039985  |
| 89 | 1  | 0 | -12.142348 | 5.597702 | -0.035924 |
| 90 | 1  | 0 | 12.141714  | 5.598146 | 0.027545  |

-----

**Cartesian coordinates of Designed Molecule A3T-W3**

-----

| Center<br>Number | Atomic<br>Number | Atomic<br>Type | Coordinates (Angstroms) |           |           |
|------------------|------------------|----------------|-------------------------|-----------|-----------|
|                  |                  |                | X                       | Y         | Z         |
| 1                | 6                | 0              | -1.281147               | -1.852008 | 0.066345  |
| 2                | 6                | 0              | -0.726764               | -0.549213 | 0.024239  |
| 3                | 6                | 0              | 0.724909                | -0.549457 | -0.022891 |
| 4                | 6                | 0              | 1.278871                | -1.852343 | -0.065654 |
| 5                | 16               | 0              | -0.001313               | -3.073828 | 0.000063  |
| 6                | 8                | 0              | 1.591249                | 0.602293  | -0.008010 |
| 7                | 8                | 0              | -1.592611               | 0.602927  | 0.009909  |
| 8                | 6                | 0              | 0.993173                | 1.596976  | 0.801850  |
| 9                | 6                | 0              | -0.994041               | 1.597848  | -0.799316 |
| 10               | 6                | 0              | -0.000244               | 2.457296  | 0.001519  |
| 11               | 6                | 0              | -0.755414               | 3.343249  | 1.010414  |
| 12               | 6                | 0              | 0.755330                | 3.343476  | -1.006883 |
| 13               | 1                | 0              | -1.285595               | 2.723790  | 1.702907  |
| 14               | 1                | 0              | -1.448724               | 3.968417  | 0.487631  |
| 15               | 1                | 0              | -0.055201               | 3.954022  | 1.541858  |
| 16               | 1                | 0              | 0.055392                | 3.954850  | -1.537993 |

|    |    |   |           |           |           |
|----|----|---|-----------|-----------|-----------|
| 17 | 1  | 0 | 1.285244  | 2.724164  | -1.699715 |
| 18 | 1  | 0 | 1.448914  | 3.968048  | -0.483751 |
| 19 | 6  | 0 | 5.217863  | -2.212922 | -0.060995 |
| 20 | 6  | 0 | 4.629153  | -3.466260 | -0.023504 |
| 21 | 6  | 0 | 3.225907  | -3.449148 | -0.076898 |
| 22 | 6  | 0 | 2.669706  | -2.144831 | -0.121268 |
| 23 | 16 | 0 | 3.985456  | -0.948320 | -0.255469 |
| 24 | 1  | 0 | 5.202406  | -4.365336 | 0.046119  |
| 25 | 6  | 0 | -2.672031 | -2.144251 | 0.121435  |
| 26 | 6  | 0 | -3.228435 | -3.448508 | 0.077029  |
| 27 | 6  | 0 | -4.631622 | -3.465604 | 0.023781  |
| 28 | 6  | 0 | -5.219918 | -2.212238 | 0.061198  |
| 29 | 16 | 0 | -3.987622 | -0.947715 | 0.255826  |
| 30 | 1  | 0 | -5.204982 | -4.364462 | -0.046652 |
| 31 | 6  | 0 | 2.430999  | -4.758994 | -0.073600 |
| 32 | 6  | 0 | -2.433886 | -4.758426 | 0.073474  |
| 33 | 1  | 0 | 2.183523  | -5.023844 | 0.932427  |
| 34 | 1  | 0 | 3.031381  | -5.533505 | -0.508618 |
| 35 | 1  | 0 | 1.537177  | -4.637797 | -0.642867 |
| 36 | 1  | 0 | -3.034532 | -5.532836 | 0.508609  |
| 37 | 1  | 0 | -1.540160 | -4.637489 | 0.643131  |
| 38 | 1  | 0 | -2.186378 | -5.023238 | -0.932291 |
| 39 | 6  | 0 | -6.608335 | -2.098390 | -0.040501 |
| 40 | 6  | 0 | 6.606430  | -2.099671 | 0.040022  |
| 41 | 6  | 0 | -7.275032 | -0.946836 | -0.037446 |
| 42 | 6  | 0 | -8.814196 | -0.843347 | -0.015697 |
| 43 | 6  | 0 | -9.124294 | 0.631733  | -0.058743 |
| 44 | 6  | 0 | -8.000865 | 1.333483  | -0.071728 |

|    |   |   |            |           |           |
|----|---|---|------------|-----------|-----------|
| 45 | 6 | 0 | -6.738298  | 0.483833  | -0.060770 |
| 46 | 6 | 0 | -9.704224  | -1.853082 | 0.018941  |
| 47 | 6 | 0 | -11.075750 | -1.598710 | 0.026511  |
| 48 | 6 | 0 | -9.255530  | -3.167681 | 0.046798  |
| 49 | 7 | 0 | -8.897573  | -4.249053 | 0.069830  |
| 50 | 7 | 0 | -12.204562 | -1.400018 | 0.032983  |
| 51 | 8 | 0 | -5.542498  | 0.880394  | -0.070569 |
| 52 | 1 | 0 | -7.180010  | -2.994744 | -0.118612 |
| 53 | 6 | 0 | -9.559268  | 3.075082  | -0.012983 |
| 54 | 6 | 0 | -8.261317  | 2.789316  | -0.088475 |
| 55 | 6 | 0 | 7.274964   | -0.949426 | 0.037782  |
| 56 | 6 | 0 | 8.816756   | -0.848300 | 0.016150  |
| 57 | 6 | 0 | 9.125888   | 0.627154  | 0.058382  |
| 58 | 6 | 0 | 8.003105   | 1.330895  | 0.071235  |
| 59 | 6 | 0 | 6.739414   | 0.482789  | 0.060660  |
| 60 | 6 | 0 | 9.703290   | -1.856358 | -0.020931 |
| 61 | 6 | 0 | 11.077544  | -1.597759 | -0.028511 |
| 62 | 6 | 0 | 9.249757   | -3.170814 | -0.047881 |
| 63 | 7 | 0 | 8.877740   | -4.247978 | -0.069962 |
| 64 | 7 | 0 | 12.203143  | -1.393105 | -0.034896 |
| 65 | 8 | 0 | 5.543913   | 0.881047  | 0.070706  |
| 66 | 6 | 0 | 9.563999   | 3.070891  | 0.012307  |
| 67 | 6 | 0 | 8.265644   | 2.787163  | 0.088302  |
| 68 | 1 | 0 | 7.177570   | -2.996102 | 0.118651  |
| 69 | 1 | 0 | -0.488243  | 1.101512  | -1.600688 |
| 70 | 1 | 0 | -1.743685  | 2.251823  | -1.193702 |
| 71 | 1 | 0 | 0.487187   | 1.100402  | 1.602955  |
| 72 | 1 | 0 | 1.743124   | 2.250389  | 1.196595  |

|    |    |   |            |          |           |
|----|----|---|------------|----------|-----------|
| 73 | 16 | 0 | 10.603495  | 1.621534 | 0.104880  |
| 74 | 16 | 0 | -10.601031 | 1.627294 | -0.105330 |
| 75 | 6  | 0 | 9.803910   | 4.569116 | -0.150457 |
| 76 | 6  | 0 | -9.796363  | 4.574120 | 0.148776  |
| 77 | 16 | 0 | -7.202172  | 4.162302 | -0.174573 |
| 78 | 16 | 0 | 7.208989   | 4.162432 | 0.173628  |
| 79 | 6  | 0 | -8.579134  | 5.246508 | 0.165059  |
| 80 | 6  | 0 | 8.588077   | 5.243753 | -0.166903 |
| 81 | 1  | 0 | -10.763532 | 5.028779 | 0.243906  |
| 82 | 1  | 0 | -8.457583  | 6.281064 | 0.359476  |
| 83 | 1  | 0 | 8.468697   | 6.278436 | -0.361398 |
| 84 | 1  | 0 | 10.772051  | 5.021625 | -0.245403 |

-----

**Cartesian coordinates of Designed Molecule A3T-W4**

-----

| Center<br>Number | Atomic<br>Number | Atomic<br>Type | Coordinates (Angstroms) |           |           |
|------------------|------------------|----------------|-------------------------|-----------|-----------|
|                  |                  |                | X                       | Y         | Z         |
| 1                | 6                | 0              | -1.269391               | -2.731057 | 0.035336  |
| 2                | 6                | 0              | -0.707596               | -1.461444 | 0.013672  |
| 3                | 6                | 0              | 0.707692                | -1.461436 | -0.013410 |
| 4                | 6                | 0              | 1.269485                | -2.731044 | -0.035610 |
| 5                | 16               | 0              | 0.000046                | -3.928819 | -0.000377 |
| 6                | 8                | 0              | 1.469603                | -0.347040 | -0.022941 |
| 7                | 8                | 0              | -1.469512               | -0.347054 | 0.023584  |
| 8                | 6                | 0              | 0.977700                | 0.742018  | 0.771291  |
| 9                | 6                | 0              | -0.977625               | 0.742234  | -0.770337 |
| 10               | 6                | 0              | 0.000034                | 1.634586  | 0.000607  |

|    |    |   |           |           |           |
|----|----|---|-----------|-----------|-----------|
| 11 | 6  | 0 | -0.747552 | 2.501279  | 1.016477  |
| 12 | 6  | 0 | 0.747603  | 2.501593  | -1.015010 |
| 13 | 1  | 0 | -1.390331 | 1.890607  | 1.656021  |
| 14 | 1  | 0 | -1.376049 | 3.236624  | 0.507061  |
| 15 | 1  | 0 | -0.049349 | 3.049590  | 1.656089  |
| 16 | 1  | 0 | 0.049387  | 3.050101  | -1.654438 |
| 17 | 1  | 0 | 1.390371  | 1.891121  | -1.654755 |
| 18 | 1  | 0 | 1.376104  | 3.236784  | -0.505379 |
| 19 | 6  | 0 | 5.161880  | -2.940937 | -0.031718 |
| 20 | 6  | 0 | 4.649720  | -4.239932 | -0.038431 |
| 21 | 6  | 0 | 3.259986  | -4.336173 | -0.045512 |
| 22 | 6  | 0 | 2.665599  | -3.061576 | -0.040673 |
| 23 | 16 | 0 | 3.855937  | -1.787133 | -0.034291 |
| 24 | 1  | 0 | 5.302394  | -5.106050 | -0.040576 |
| 25 | 6  | 0 | -2.665513 | -3.061568 | 0.040223  |
| 26 | 6  | 0 | -3.259947 | -4.336148 | 0.044521  |
| 27 | 6  | 0 | -4.649675 | -4.239847 | 0.037443  |
| 28 | 6  | 0 | -5.161787 | -2.940825 | 0.031280  |
| 29 | 16 | 0 | -3.855799 | -1.787079 | 0.034341  |
| 30 | 1  | 0 | -5.302383 | -5.105940 | 0.039215  |
| 31 | 6  | 0 | 2.548722  | -5.654792 | -0.059957 |
| 32 | 6  | 0 | -2.548743 | -5.654805 | 0.058420  |
| 33 | 1  | 0 | 1.931782  | -5.797709 | 0.832284  |
| 34 | 1  | 0 | 3.274169  | -6.469255 | -0.091790 |
| 35 | 1  | 0 | 1.898064  | -5.759623 | -0.933131 |
| 36 | 1  | 0 | -3.274225 | -6.469249 | 0.089939  |
| 37 | 1  | 0 | -1.898066 | -5.760014 | 0.931534  |
| 38 | 1  | 0 | -1.931833 | -5.797391 | -0.833895 |

|    |   |   |            |           |           |
|----|---|---|------------|-----------|-----------|
| 39 | 6 | 0 | -6.562586  | -2.733784 | 0.031542  |
| 40 | 6 | 0 | 6.562683   | -2.733923 | -0.031908 |
| 41 | 6 | 0 | -7.360940  | -1.614282 | 0.022242  |
| 42 | 6 | 0 | -8.821382  | -1.588141 | 0.028803  |
| 43 | 6 | 0 | -9.237904  | -0.167852 | 0.011862  |
| 44 | 6 | 0 | -8.079582  | 0.639755  | -0.006317 |
| 45 | 6 | 0 | -6.881909  | -0.218885 | -0.001896 |
| 46 | 6 | 0 | -9.693239  | -2.657619 | 0.049535  |
| 47 | 6 | 0 | -11.110295 | -2.510387 | 0.054310  |
| 48 | 6 | 0 | -9.285780  | -4.022553 | 0.068993  |
| 49 | 7 | 0 | -8.990260  | -5.147343 | 0.085015  |
| 50 | 7 | 0 | -12.270274 | -2.431334 | 0.058487  |
| 51 | 8 | 0 | -5.724777  | 0.171232  | -0.016354 |
| 52 | 1 | 0 | -7.082831  | -3.684850 | 0.041964  |
| 53 | 6 | 0 | -10.491866 | 0.425509  | 0.011827  |
| 54 | 6 | 0 | -10.562954 | 1.828175  | -0.006460 |
| 55 | 6 | 0 | -9.376278  | 2.607781  | -0.024280 |
| 56 | 6 | 0 | -8.114148  | 2.017941  | -0.024380 |
| 57 | 1 | 0 | -11.408133 | -0.147934 | 0.025377  |
| 58 | 1 | 0 | -7.193006  | 2.589069  | -0.037467 |
| 59 | 6 | 0 | 7.361015   | -1.614411 | -0.022066 |
| 60 | 6 | 0 | 8.821473   | -1.588161 | -0.028628 |
| 61 | 6 | 0 | 9.237881   | -0.167865 | -0.010590 |
| 62 | 6 | 0 | 8.079511   | 0.639654  | 0.008079  |
| 63 | 6 | 0 | 6.881896   | -0.219057 | 0.002837  |
| 64 | 6 | 0 | 9.693517   | -2.657473 | -0.050201 |
| 65 | 6 | 0 | 11.110537  | -2.509895 | -0.054886 |
| 66 | 6 | 0 | 9.286387   | -4.022488 | -0.070737 |

|    |    |   |            |           |           |
|----|----|---|------------|-----------|-----------|
| 67 | 7  | 0 | 8.991340   | -5.147390 | -0.087639 |
| 68 | 7  | 0 | 12.270491  | -2.430490 | -0.059029 |
| 69 | 8  | 0 | 5.724742   | 0.170963  | 0.018234  |
| 70 | 6  | 0 | 10.491813  | 0.425552  | -0.009963 |
| 71 | 6  | 0 | 10.562825  | 1.828206  | 0.009466  |
| 72 | 6  | 0 | 9.376101   | 2.607733  | 0.027810  |
| 73 | 6  | 0 | 8.114000   | 2.017827  | 0.027207  |
| 74 | 1  | 0 | 11.408108  | -0.147844 | -0.023817 |
| 75 | 1  | 0 | 7.192825   | 2.588895  | 0.040586  |
| 76 | 1  | 0 | 7.082914   | -3.684984 | -0.042771 |
| 77 | 1  | 0 | -0.507166  | 0.339009  | -1.672616 |
| 78 | 1  | 0 | -1.863304  | 1.308095  | -1.065897 |
| 79 | 1  | 0 | 0.507244   | 0.338530  | 1.673455  |
| 80 | 1  | 0 | 1.863374   | 1.307799  | 1.067016  |
| 81 | 6  | 0 | -11.741984 | 2.642609  | -0.009316 |
| 82 | 6  | 0 | 11.741812  | 2.642697  | 0.013317  |
| 83 | 6  | 0 | -11.443629 | 3.964691  | -0.029833 |
| 84 | 6  | 0 | 11.443382  | 3.964755  | 0.034325  |
| 85 | 1  | 0 | 12.751609  | 2.256163  | 0.001555  |
| 86 | 1  | 0 | -12.751754 | 2.256025  | 0.003109  |
| 87 | 16 | 0 | -9.736248  | 4.310260  | -0.044702 |
| 88 | 16 | 0 | 9.735981   | 4.310217  | 0.049482  |
| 89 | 35 | 0 | -12.652245 | 5.380535  | -0.047054 |
| 90 | 35 | 0 | 12.651850  | 5.380807  | 0.041517  |

---

**Cartesian coordinates of Designed Molecule A3T-W5**

---

| Center<br>Number | Atomic<br>Number | Atomic<br>Type | Coordinates (Angstroms) |           |           |
|------------------|------------------|----------------|-------------------------|-----------|-----------|
|                  |                  |                | X                       | Y         | Z         |
| 1                | 6                | 0              | -1.278667               | -1.850959 | 0.034857  |
| 2                | 6                | 0              | -0.716165               | -0.581760 | 0.013309  |
| 3                | 6                | 0              | 0.699358                | -0.583001 | -0.011994 |
| 4                | 6                | 0              | 1.259613                | -1.853176 | -0.034269 |
| 5                | 16               | 0              | -0.010584               | -3.050241 | -0.000093 |
| 6                | 8                | 0              | 1.462120                | 0.530426  | -0.020531 |
| 7                | 8                | 0              | -1.476972               | 0.533007  | 0.022524  |
| 8                | 6                | 0              | 0.969878                | 1.620171  | 0.773720  |
| 9                | 6                | 0              | -0.982846               | 1.622321  | -0.771089 |
| 10               | 6                | 0              | -0.005674               | 2.513638  | 0.001539  |
| 11               | 6                | 0              | -0.753950               | 3.380924  | 1.016422  |
| 12               | 6                | 0              | 0.744230                | 3.380054  | -1.012889 |
| 13               | 1                | 0              | -1.398259               | 2.770888  | 1.655049  |
| 14               | 1                | 0              | -1.380757               | 4.117060  | 0.506123  |
| 15               | 1                | 0              | -0.056227               | 3.928431  | 1.657164  |
| 16               | 1                | 0              | 0.047556                | 3.929171  | -1.653391 |
| 17               | 1                | 0              | 1.387426                | 2.769130  | -1.651791 |
| 18               | 1                | 0              | 1.372382                | 4.114772  | -0.502198 |
| 19               | 6                | 0              | 5.151589                | -2.064563 | -0.026282 |
| 20               | 6                | 0              | 4.639345                | -3.363454 | -0.037044 |
| 21               | 6                | 0              | 3.249551                | -3.459329 | -0.045602 |
| 22               | 6                | 0              | 2.655486                | -2.184611 | -0.037897 |
| 23               | 16               | 0              | 3.845775                | -0.910526 | -0.028100 |
| 24               | 1                | 0              | 5.291611                | -4.229854 | -0.040456 |
| 25               | 6                | 0              | -2.675129               | -2.179944 | 0.038236  |



|    |    |   |            |           |           |
|----|----|---|------------|-----------|-----------|
| 26 | 6  | 0 | -3.271451  | -3.453614 | 0.045655  |
| 27 | 6  | 0 | -4.661075  | -3.355286 | 0.036764  |
| 28 | 6  | 0 | -5.171026  | -2.055495 | 0.026038  |
| 29 | 16 | 0 | -3.863175  | -0.903769 | 0.028333  |
| 30 | 1  | 0 | -5.314868  | -4.220535 | 0.039947  |
| 31 | 6  | 0 | 2.537565   | -4.777494 | -0.064474 |
| 32 | 6  | 0 | -2.561825  | -4.773048 | 0.064592  |
| 33 | 1  | 0 | 1.918274   | -4.921896 | 0.825819  |
| 34 | 1  | 0 | 3.262456   | -5.592388 | -0.096034 |
| 35 | 1  | 0 | 1.889202   | -4.879722 | -0.939713 |
| 36 | 1  | 0 | -3.288172  | -5.586628 | 0.096607  |
| 37 | 1  | 0 | -1.913331  | -4.876228 | 0.939615  |
| 38 | 1  | 0 | -1.943119  | -4.918783 | -0.825897 |
| 39 | 6  | 0 | -6.571046  | -1.844866 | 0.023481  |
| 40 | 6  | 0 | 6.551976   | -1.856396 | -0.023957 |
| 41 | 6  | 0 | -7.366073  | -0.723126 | 0.011124  |
| 42 | 6  | 0 | -8.826230  | -0.693038 | 0.016631  |
| 43 | 6  | 0 | -9.235728  | 0.729559  | -0.006988 |
| 44 | 6  | 0 | -8.087007  | 1.530030  | -0.026416 |
| 45 | 6  | 0 | -6.886177  | 0.671442  | -0.016171 |
| 46 | 6  | 0 | -9.705128  | -1.754770 | 0.040622  |
| 47 | 6  | 0 | -11.120940 | -1.594246 | 0.043706  |
| 48 | 6  | 0 | -9.305746  | -3.122308 | 0.065121  |
| 49 | 7  | 0 | -9.014860  | -4.248011 | 0.085413  |
| 50 | 7  | 0 | -12.279597 | -1.500478 | 0.046807  |
| 51 | 8  | 0 | -5.731928  | 1.066000  | -0.030154 |
| 52 | 1  | 0 | -7.094608  | -2.794169 | 0.034582  |
| 53 | 6  | 0 | -10.493076 | 1.337253  | -0.011752 |

|    |    |   |            |           |           |
|----|----|---|------------|-----------|-----------|
| 54 | 6  | 0 | -8.131785  | 2.914234  | -0.050486 |
| 55 | 1  | 0 | -11.426962 | 0.792995  | 0.002232  |
| 56 | 6  | 0 | 7.348968   | -0.736052 | -0.011584 |
| 57 | 6  | 0 | 8.809172   | -0.708526 | -0.017326 |
| 58 | 6  | 0 | 9.221169   | 0.713352  | 0.006170  |
| 59 | 6  | 0 | 8.073856   | 1.515834  | 0.025828  |
| 60 | 6  | 0 | 6.871522   | 0.659352  | 0.015842  |
| 61 | 6  | 0 | 9.686198   | -1.771802 | -0.041360 |
| 62 | 6  | 0 | 11.102289  | -1.613766 | -0.044691 |
| 63 | 6  | 0 | 9.284400   | -3.138635 | -0.065653 |
| 64 | 7  | 0 | 8.991559   | -4.263834 | -0.085780 |
| 65 | 7  | 0 | 12.261108  | -1.522034 | -0.048000 |
| 66 | 8  | 0 | 5.717966   | 1.055925  | 0.030070  |
| 67 | 6  | 0 | 10.479581  | 1.318841  | 0.010657  |
| 68 | 6  | 0 | 8.121065   | 2.899959  | 0.049863  |
| 69 | 1  | 0 | 11.412509  | 0.772947  | -0.003519 |
| 70 | 1  | 0 | 7.073871   | -2.806613 | -0.035310 |
| 71 | 1  | 0 | -0.511514  | 1.218356  | -1.672487 |
| 72 | 1  | 0 | -1.867709  | 2.188694  | -1.067823 |
| 73 | 1  | 0 | 0.497829   | 1.216524  | 1.674883  |
| 74 | 1  | 0 | 1.855748   | 2.184807  | 1.070758  |
| 75 | 16 | 0 | -9.840712  | 2.996833  | -0.044082 |
| 76 | 16 | 0 | 9.862748   | 2.977914  | 0.042903  |
| 77 | 16 | 0 | 6.636824   | 3.882245  | 0.073182  |
| 78 | 16 | 0 | -6.645821  | 3.893918  | -0.073508 |
| 79 | 6  | 0 | -6.751504  | 5.670319  | -0.113889 |
| 80 | 6  | 0 | 7.068446   | 5.608667  | 0.112808  |
| 81 | 1  | 0 | 8.002284   | 5.754447  | -0.388784 |

|    |   |   |           |          |           |
|----|---|---|-----------|----------|-----------|
| 82 | 1 | 0 | 6.307129  | 6.178010 | -0.378257 |
| 83 | 1 | 0 | 7.155383  | 5.931336 | 1.129286  |
| 84 | 1 | 0 | -5.900816 | 6.066635 | -0.627857 |
| 85 | 1 | 0 | -7.645036 | 5.962939 | -0.624647 |
| 86 | 1 | 0 | -6.772189 | 6.049220 | 0.886565  |

-----

**Cartesian coordinates of Designed Molecule A3T-W6**

-----

| Center<br>Number | Atomic<br>Number | Atomic<br>Type | Coordinates (Angstroms) |           |           |
|------------------|------------------|----------------|-------------------------|-----------|-----------|
|                  |                  |                | X                       | Y         | Z         |
| 1                | 6                | 0              | -1.287350               | -2.518989 | 0.035502  |
| 2                | 6                | 0              | -0.722603               | -1.250765 | 0.015267  |
| 3                | 6                | 0              | 0.692862                | -1.254507 | -0.012887 |
| 4                | 6                | 0              | 1.250778                | -2.525644 | -0.038736 |
| 5                | 16               | 0              | -0.021507               | -3.720483 | -0.004310 |
| 6                | 8                | 0              | 1.457613                | -0.142442 | -0.020814 |
| 7                | 8                | 0              | -1.481377               | -0.134650 | 0.028161  |
| 8                | 6                | 0              | 0.968936                | 0.946654  | 0.776524  |
| 9                | 6                | 0              | -0.986881               | 0.955301  | -0.764345 |
| 10               | 6                | 0              | -0.006551               | 1.843365  | 0.008030  |
| 11               | 6                | 0              | -0.751220               | 2.710036  | 1.026086  |
| 12               | 6                | 0              | 0.742876                | 2.710385  | -1.006234 |
| 13               | 1                | 0              | -1.395345               | 2.099931  | 1.664833  |
| 14               | 1                | 0              | -1.377722               | 3.448284  | 0.518469  |
| 15               | 1                | 0              | -0.051225               | 3.255049  | 1.666476  |
| 16               | 1                | 0              | 0.045908                | 3.261990  | -1.644273 |

|    |    |   |           |           |           |
|----|----|---|-----------|-----------|-----------|
| 17 | 1  | 0 | 1.383683  | 2.099538  | -1.647605 |
| 18 | 1  | 0 | 1.373378  | 3.442983  | -0.495394 |
| 19 | 6  | 0 | 5.142373  | -2.744055 | -0.038990 |
| 20 | 6  | 0 | 4.627766  | -4.041999 | -0.051223 |
| 21 | 6  | 0 | 3.237787  | -4.135354 | -0.057168 |
| 22 | 6  | 0 | 2.646040  | -2.859584 | -0.045812 |
| 23 | 16 | 0 | 3.838644  | -1.587667 | -0.035956 |
| 24 | 1  | 0 | 5.278459  | -4.909564 | -0.057616 |
| 25 | 6  | 0 | -2.684395 | -2.845465 | 0.041058  |
| 26 | 6  | 0 | -3.282999 | -4.118070 | 0.047224  |
| 27 | 6  | 0 | -4.672457 | -4.017222 | 0.041319  |
| 28 | 6  | 0 | -5.180082 | -2.716497 | 0.034123  |
| 29 | 16 | 0 | -3.870152 | -1.567135 | 0.036005  |
| 30 | 1  | 0 | -5.327804 | -4.881297 | 0.044151  |
| 31 | 6  | 0 | 2.523386  | -5.452196 | -0.077147 |
| 32 | 6  | 0 | -2.575718 | -5.438814 | 0.062191  |
| 33 | 1  | 0 | 1.905625  | -5.597199 | 0.814111  |
| 34 | 1  | 0 | 3.246740  | -6.268331 | -0.111735 |
| 35 | 1  | 0 | 1.873082  | -5.551566 | -0.951274 |
| 36 | 1  | 0 | -3.303466 | -6.251145 | 0.094101  |
| 37 | 1  | 0 | -1.925655 | -5.544851 | 0.935707  |
| 38 | 1  | 0 | -1.959066 | -5.583944 | -0.829820 |
| 39 | 6  | 0 | -6.579722 | -2.503342 | 0.034790  |
| 40 | 6  | 0 | 6.543136  | -2.538416 | -0.039082 |
| 41 | 6  | 0 | -7.372746 | -1.380150 | 0.026194  |
| 42 | 6  | 0 | -8.832833 | -1.347443 | 0.034698  |
| 43 | 6  | 0 | -9.239809 | 0.075932  | 0.014644  |
| 44 | 6  | 0 | -8.089686 | 0.874369  | -0.005554 |

|    |   |   |            |           |           |
|----|---|---|------------|-----------|-----------|
| 45 | 6 | 0 | -6.890390  | 0.013601  | 0.000619  |
| 46 | 6 | 0 | -9.713595  | -2.407635 | 0.058412  |
| 47 | 6 | 0 | -11.129107 | -2.244567 | 0.064655  |
| 48 | 6 | 0 | -9.316635  | -3.775935 | 0.079473  |
| 49 | 7 | 0 | -9.027740  | -4.902196 | 0.097011  |
| 50 | 7 | 0 | -12.287584 | -2.148719 | 0.070269  |
| 51 | 8 | 0 | -5.735461  | 0.406106  | -0.014926 |
| 52 | 1 | 0 | -7.104973  | -3.451721 | 0.045116  |
| 53 | 6 | 0 | -10.496065 | 0.685898  | 0.013581  |
| 54 | 6 | 0 | -10.540752 | 2.069969  | -0.007849 |
| 55 | 6 | 0 | -9.380517  | 2.852323  | -0.027760 |
| 56 | 6 | 0 | -8.132015  | 2.258695  | -0.026868 |
| 57 | 1 | 0 | -11.430902 | 0.143297  | 0.028396  |
| 58 | 1 | 0 | -7.226738  | 2.853245  | -0.041549 |
| 59 | 6 | 0 | 7.342172   | -1.419535 | -0.026155 |
| 60 | 6 | 0 | 8.802409   | -1.394628 | -0.034783 |
| 61 | 6 | 0 | 9.217018   | 0.026458  | -0.009377 |
| 62 | 6 | 0 | 8.071197   | 0.830966  | 0.014136  |
| 63 | 6 | 0 | 6.867301   | -0.023329 | 0.004919  |
| 64 | 6 | 0 | 9.677464   | -2.459433 | -0.062630 |
| 65 | 6 | 0 | 11.093828  | -2.303942 | -0.068507 |
| 66 | 6 | 0 | 9.273152   | -3.825491 | -0.088747 |
| 67 | 7 | 0 | 8.978241   | -4.950119 | -0.110452 |
| 68 | 7 | 0 | 12.252802  | -2.214291 | -0.073971 |
| 69 | 8 | 0 | 5.714494   | 0.375293  | 0.022233  |
| 70 | 6 | 0 | 10.476527  | 0.629670  | -0.006257 |
| 71 | 6 | 0 | 10.528639  | 2.013389  | 0.020460  |
| 72 | 6 | 0 | 9.372621   | 2.801871  | 0.043628  |

|     |   |   |            |           |           |
|-----|---|---|------------|-----------|-----------|
| 73  | 6 | 0 | 8.120952   | 2.214954  | 0.040742  |
| 74  | 1 | 0 | 11.408438  | 0.082125  | -0.023362 |
| 75  | 1 | 0 | 7.063291   | -3.489547 | -0.053316 |
| 76  | 1 | 0 | -0.518091  | 0.552229  | -1.667466 |
| 77  | 1 | 0 | -1.871315  | 1.523839  | -1.058206 |
| 78  | 1 | 0 | 0.497970   | 0.542118  | 1.677856  |
| 79  | 1 | 0 | 1.856419   | 1.509119  | 1.072865  |
| 80  | 6 | 0 | -11.911943 | 2.770991  | -0.009834 |
| 81  | 6 | 0 | -9.495602  | 4.387843  | -0.050865 |
| 82  | 6 | 0 | 9.495943   | 4.336652  | 0.072588  |
| 83  | 6 | 0 | 11.903570  | 2.707037  | 0.024816  |
| 84  | 1 | 0 | 7.228401   | 2.804821  | 0.058317  |
| 85  | 8 | 0 | -11.976088 | 4.027718  | -0.019381 |
| 86  | 8 | 0 | -10.629378 | 4.933821  | -0.056323 |
| 87  | 8 | 0 | 10.632632  | 4.876515  | 0.080117  |
| 88  | 8 | 0 | 11.974454  | 3.963363  | 0.038637  |
| 89  | 8 | 0 | 13.099741  | 1.923495  | 0.013155  |
| 90  | 8 | 0 | 8.318764   | 5.148326  | 0.090923  |
| 91  | 8 | 0 | -8.314085  | 5.193252  | -0.066116 |
| 92  | 8 | 0 | -13.112299 | 1.993840  | -0.000827 |
| 93  | 6 | 0 | -14.385548 | 2.644788  | -0.002669 |
| 94  | 6 | 0 | -7.918932  | 6.556286  | -0.241878 |
| 95  | 6 | 0 | 8.691813   | 6.528575  | 0.116330  |
| 96  | 6 | 0 | 14.237270  | 2.790029  | 0.020019  |
| 97  | 1 | 0 | -14.306691 | 3.581106  | -0.514519 |
| 98  | 1 | 0 | -15.102069 | 2.025393  | -0.500511 |
| 99  | 1 | 0 | -14.700594 | 2.814938  | 1.005643  |
| 100 | 1 | 0 | 15.049170  | 2.316864  | -0.491678 |

|     |   |   |           |          |           |
|-----|---|---|-----------|----------|-----------|
| 101 | 1 | 0 | 13.990336 | 3.706688 | -0.473600 |
| 102 | 1 | 0 | 14.523463 | 2.994920 | 1.030471  |
| 103 | 1 | 0 | 9.627029  | 6.654615 | -0.388036 |
| 104 | 1 | 0 | 7.940235  | 7.110280 | -0.375250 |
| 105 | 1 | 0 | 8.787309  | 6.853605 | 1.131286  |
| 106 | 1 | 0 | -6.982158 | 6.592387 | -0.757678 |
| 107 | 1 | 0 | -8.661418 | 7.071904 | -0.814376 |
| 108 | 1 | 0 | -7.817548 | 7.024461 | 0.714905  |

-----

**Cartesian coordinates of Designed Molecule A3T-W7**

-----

| <b>Center</b> | <b>Atomic</b> | <b>Atomic</b> | <b>Coordinates (Angstroms)</b> |           |           |
|---------------|---------------|---------------|--------------------------------|-----------|-----------|
| <b>Number</b> | <b>Number</b> | <b>Type</b>   | <b>X</b>                       | <b>Y</b>  | <b>Z</b>  |
| 1             | 6             | 0             | -1.271799                      | -1.894353 | 0.035295  |
| 2             | 6             | 0             | -0.709575                      | -0.625034 | 0.013540  |
| 3             | 6             | 0             | 0.705942                       | -0.625974 | -0.012180 |
| 4             | 6             | 0             | 1.266461                       | -1.896030 | -0.034579 |
| 5             | 16            | 0             | -0.003470                      | -3.093365 | 0.000010  |
| 6             | 8             | 0             | 1.468463                       | 0.487615  | -0.020978 |
| 7             | 8             | 0             | -1.470617                      | 0.489571  | 0.022943  |
| 8             | 6             | 0             | 0.976223                       | 1.577282  | 0.773383  |
| 9             | 6             | 0             | -0.976958                      | 1.578964  | -0.770851 |
| 10            | 6             | 0             | 0.000252                       | 2.470515  | 0.001460  |
| 11            | 6             | 0             | -0.747910                      | 3.337673  | 1.016536  |
| 12            | 6             | 0             | 0.749672                       | 3.337058  | -1.013217 |
| 13            | 1             | 0             | -1.391900                      | 2.727521  | 1.655373  |

|    |    |   |           |           |           |
|----|----|---|-----------|-----------|-----------|
| 14 | 1  | 0 | -1.375025 | 4.073659  | 0.506398  |
| 15 | 1  | 0 | -0.050115 | 3.885351  | 1.657055  |
| 16 | 1  | 0 | 0.052692  | 3.886005  | -1.653531 |
| 17 | 1  | 0 | 1.392810  | 2.726251  | -1.652288 |
| 18 | 1  | 0 | 1.377818  | 4.071927  | -0.502734 |
| 19 | 6  | 0 | 5.158484  | -2.106586 | -0.027732 |
| 20 | 6  | 0 | 4.646515  | -3.405587 | -0.038302 |
| 21 | 6  | 0 | 3.256739  | -3.501759 | -0.046446 |
| 22 | 6  | 0 | 2.662404  | -2.227167 | -0.038607 |
| 23 | 16 | 0 | 3.852423  | -0.952828 | -0.029202 |
| 24 | 1  | 0 | 5.298965  | -4.271847 | -0.041877 |
| 25 | 6  | 0 | -2.668190 | -2.223636 | 0.039097  |
| 26 | 6  | 0 | -3.264238 | -3.497433 | 0.046733  |
| 27 | 6  | 0 | -4.653885 | -3.399402 | 0.038248  |
| 28 | 6  | 0 | -5.164117 | -2.099721 | 0.027630  |
| 29 | 16 | 0 | -3.856511 | -0.947715 | 0.029503  |
| 30 | 1  | 0 | -5.307492 | -4.264791 | 0.041651  |
| 31 | 6  | 0 | 2.545029  | -4.820077 | -0.065066 |
| 32 | 6  | 0 | -2.554324 | -4.816715 | 0.065503  |
| 33 | 1  | 0 | 1.926031  | -4.964581 | 0.825414  |
| 34 | 1  | 0 | 3.270085  | -5.634817 | -0.096813 |
| 35 | 1  | 0 | 1.896430  | -4.922471 | -0.940110 |
| 36 | 1  | 0 | -3.280488 | -5.630449 | 0.097759  |
| 37 | 1  | 0 | -1.905550 | -4.919728 | 0.940339  |
| 38 | 1  | 0 | -1.935849 | -4.962346 | -0.825163 |
| 39 | 6  | 0 | -6.564182 | -1.889391 | 0.025479  |
| 40 | 6  | 0 | 6.558827  | -1.898120 | -0.025827 |
| 41 | 6  | 0 | -7.359452 | -0.767820 | 0.013320  |



|    |   |   |            |           |           |
|----|---|---|------------|-----------|-----------|
| 42 | 6 | 0 | -8.819615  | -0.738044 | 0.019257  |
| 43 | 6 | 0 | -9.229423  | 0.684465  | -0.004287 |
| 44 | 6 | 0 | -8.080879  | 1.485180  | -0.024080 |
| 45 | 6 | 0 | -6.879863  | 0.626849  | -0.014162 |
| 46 | 6 | 0 | -9.698278  | -1.799963 | 0.043541  |
| 47 | 6 | 0 | -11.114124 | -1.639741 | 0.047037  |
| 48 | 6 | 0 | -9.298597  | -3.167415 | 0.067966  |
| 49 | 7 | 0 | -9.007465  | -4.293055 | 0.088209  |
| 50 | 7 | 0 | -12.272799 | -1.546221 | 0.050477  |
| 51 | 8 | 0 | -5.725702  | 1.021653  | -0.028498 |
| 52 | 1 | 0 | -7.087538  | -2.838805 | 0.036765  |
| 53 | 6 | 0 | -10.486901 | 1.291890  | -0.008701 |
| 54 | 6 | 0 | -10.534341 | 2.675824  | -0.032923 |
| 55 | 6 | 0 | -9.375653  | 3.460477  | -0.052379 |
| 56 | 6 | 0 | -8.125960  | 2.869374  | -0.048182 |
| 57 | 1 | 0 | -11.420668 | 0.747433  | 0.005577  |
| 58 | 1 | 0 | -7.221859  | 3.465720  | -0.062477 |
| 59 | 6 | 0 | 7.355583   | -0.777605 | -0.013725 |
| 60 | 6 | 0 | 8.815780   | -0.749767 | -0.019898 |
| 61 | 6 | 0 | 9.227480   | 0.672200  | 0.003430  |
| 62 | 6 | 0 | 8.080002   | 1.474437  | 0.023401  |
| 63 | 6 | 0 | 6.877848   | 0.617697  | 0.013796  |
| 64 | 6 | 0 | 9.693026   | -1.812857 | -0.044156 |
| 65 | 6 | 0 | 11.109082  | -1.654519 | -0.047910 |
| 66 | 6 | 0 | 9.291513   | -3.179776 | -0.068286 |
| 67 | 7 | 0 | 8.998906   | -4.305038 | -0.088291 |
| 68 | 7 | 0 | 12.267881  | -1.562540 | -0.051563 |
| 69 | 8 | 0 | 5.724211   | 1.014025  | 0.028351  |

|    |   |   |            |           |           |
|----|---|---|------------|-----------|-----------|
| 70 | 6 | 0 | 10.485764  | 1.277957  | 0.007526  |
| 71 | 6 | 0 | 10.535042  | 2.661829  | 0.031618  |
| 72 | 6 | 0 | 9.377398   | 3.448019  | 0.051257  |
| 73 | 6 | 0 | 8.126922   | 2.858573  | 0.047377  |
| 74 | 1 | 0 | 11.418804  | 0.732262  | -0.006907 |
| 75 | 1 | 0 | 7.223615   | 3.456117  | 0.061814  |
| 76 | 1 | 0 | 7.080922   | -2.848226 | -0.037303 |
| 77 | 1 | 0 | -0.505804  | 1.175070  | -1.672374 |
| 78 | 1 | 0 | -1.862029  | 2.145139  | -1.067342 |
| 79 | 1 | 0 | 0.504525   | 1.173562  | 1.674698  |
| 80 | 1 | 0 | 1.862059   | 2.142116  | 1.070141  |
| 81 | 6 | 0 | -11.753777 | 3.321847  | -0.038182 |
| 82 | 6 | 0 | -9.512563  | 4.833472  | -0.075619 |
| 83 | 6 | 0 | 9.516134   | 4.820833  | 0.074352  |
| 84 | 6 | 0 | 11.755335  | 3.306236  | 0.036561  |
| 85 | 6 | 0 | -11.865653 | 4.669329  | -0.049500 |
| 86 | 6 | 0 | -10.718067 | 5.447084  | -0.086334 |
| 87 | 6 | 0 | 10.770265  | 5.504542  | 0.084955  |
| 88 | 6 | 0 | 11.917854  | 4.725303  | 0.049428  |
| 89 | 1 | 0 | 8.624751   | 5.412628  | 0.085029  |
| 90 | 1 | 0 | 12.638760  | 2.702563  | 0.030341  |
| 91 | 1 | 0 | 12.890158  | 5.171655  | 0.032277  |
| 92 | 1 | 0 | 10.822582  | 6.572724  | 0.118869  |
| 93 | 1 | 0 | -8.629236  | 5.437240  | -0.085568 |
| 94 | 1 | 0 | -12.646901 | 2.732607  | -0.033099 |
| 95 | 1 | 0 | -12.830625 | 5.131234  | -0.030215 |
| 96 | 1 | 0 | -10.785041 | 6.514370  | -0.122613 |

---
